# Supplementary material for: Ultrasmall Core-Shell Silica Nanoparticles for Precision Drug Delivery in a High-Grade Malignant Brain Tumor Model
Source: Oxford University Press journal article supplement (doi:10.1158/1078-0432.ccr-19-1834), 2019-09-12
Supplement: 10780432ccr191834-sup-223490_2_supp_5715901_pwc3vm.docx [file 10780432ccr191834-sup-223490_2_supp_5715901_pwc3vm.docx]

**Supplemental Information**

**Ultrasmall Core-Shell Silica Nanoparticles for Precision Drug Delivery in a High-Grade Malignant Brain Tumor Model**

*Rupa Juthani1†, Brian Madajewski2†, Barney Yoo2,3†,Li Zhang2, Pei-Ming Chen2, Feng Chen2, Melik Z. Turker4, Kai Ma4, Michael Overholtzer5,6, Valerie A. Longo7, Sean Carlin2,Virginia Aragon-Sanabria2, Jason Huse8, Mithat Gonen9, Pat Zanzonico10, Charles M. Rudin11, Ulrich Wiesner4*, Michelle S. Bradbury2,12*, Cameron W. Brennan1,**

1Department of Neurosurgery, Sloan Kettering Institute for Cancer Research, New York, NY 10065, USA

2Department of Radiology, Sloan Kettering Institute for Cancer Research, New York, NY 10065, USA

3Department of Chemistry, Hunter College, City University of New York, New York, NY, 10065, USA

4Department of Materials Science & Engineering, Cornell University, Ithaca, NY 14853, USA

5Cell Biology Program, Sloan Kettering Institute for Cancer Research, New York, NY 10065, USA

6BCMB Allied Program, Weill Cornell Medical College, New York, NY 10065, USA

7Small-Animal Imaging Core Facility, Memorial Sloan Kettering Cancer Center, New York, NY, 10065, USA

8Human Oncology & Pathogenesis Program, Sloan Kettering Institute for Cancer Research, New York, NY 10065, USA

9Department of Epidemiology and Biostatistics, Sloan Kettering Institute for Cancer Research, New York, NY 10065, USA

10Department of Medical Physics, Sloan Kettering Institute for Cancer Research, New York, NY 10065, USA

11Thoracic Oncology Service, Memorial Sloan Kettering Cancer Center, New York, NY

12Molecular Pharmacology Program, Sloan Kettering Institute for Cancer Research, New York, NY 10065, USA

**Materials and Methods**

**Synthesis and Characterization of cRGD- and cRAD-C’ dots.** Different types of ultrasmall (hydrodynamic diameter below 10 nm) C’ dots employed in this study were synthesized using previously reported protocols moving from alcoholic (1,2) to aqueous reaction media (3-5).For brevity, the main steps are summarized in the following: Silane-conjugated and negatively charged Cy5 fluorescent dye [from reaction of mercapto-silane (MPTMS) and Cy5-mal] and tetramethyl orthosilicate (TMOS) were added into an aqueous solution at pH around 8.5 at room temperature under vigorous stirring to form Cy5-encapsulated silica nanoparticles. Heterobifunctional polyethylene glycol (mal-PEG12-NHS), functionalized with an amino-silane (APTMS) group and cyclic(arginine-glycine-aspartic acid-D-tyrosine-cysteine) (cRGDY) peptide (cRGDY-PEG12-silane), was then added into the reaction mixture, directly followed by the addition of monofunctional PEG (PEG6-NHS) functionalized with APTMS to provide PEG-silane. The reaction solution was then heat treated at 80°C overnight, leading to the formation of PEGylated silica particles encapsulating Cy5 dye in the silica core and bearing cRGDY peptides on the particle PEG corona (cRGDY-PEG12_PEG6-Cy5-C’ dots, or simply cRGD-C’ dots).

C’ dots bearing non-targeting cRAD peptides on the particle PEG corona (cRAD-PEG12_PEG6-Cy5-C’ dots, or simply cRAD-C’ dots) were synthesized via replacing cRGD peptide by cRAD peptides in the synthesis procedure described above. The remainder of the synthesis stayed the same. Functional group bearing targeted C’ dots to generate targeted nanoparticle drug conjugates (NDCs), Mal-PEG12_cRGDY-PEG12_PEG6-Cy5-C’ dots (or simply Mal-cRDGY-C’ dots), containing maleimide (mal) functional groups on the outside of the PEGylated particle surface for attachment of dasatinib drug-linker, were synthesized by adding heterobifunctional PEG-silane (mal-PEG12-silane) together with cRGDY-PEG12-silane in the PEGylation step described above. The remainder of the synthesis stayed the same. Finally, amine-functionalized C’ dots, NH2_cRGDY-PEG12_PEG6-C’ dots (or simply NH2-cRGDY-C’ dots), used for the generation of positron emission tomography (PET) sensitive 89Zr-labeled C’ dots, were synthesized by further adding (3-aminopropyl) triethoxysilane (APTES) into the reaction mixture after the final heat treatment step in the synthesis procedure described above. In this approach, referred to as post-PEGylation surface modification by insertion (PPSMI) (5) the amine groups are inserted in between the PEG chains of the final sterically stabilized particles thereby preventing particle aggregation. After addition of APTES the reaction was stirred at room temperature overnight.

All particles were purified from precursors and particle aggregates by gel permeation chromatography (GPC) (3). Product purity and characterization steps included: a final GPC run after purification, fluorescence correlation spectroscopy (FCS) experiments to determine particle size, concentration, and brightness, UV-Vis absorption spectroscopy measurements in combination with FCS concentration results to determine the number of dyes and surface ligands per particle, as well as transmission electron microscopy (TEM) to determine rigid silica core size. GPC purification and purity control runs of C’ dots were performed using a Bio-rad BioLogic LP system equipped with a 275 nm UV detector. The GPC column was home-packed using Superdex 200 resin. FCS measurements were performed using a home-built FCS setup with a 633 nm solid state laser as the excitation source. TEM images were taken on a FEI Tecnai T12 Spirit TEM operated at an acceleration voltage of 120 kV. Details of C’ dot characterization by FCS and UV/VIS as well as in-depth size characterization of these materials demonstrating C’ dot silica core dispersity of only 20% are discussed elsewhere (6-8).

**Cell Lines.** RCAS/*tv-a* derived, DXFM murine glioma cells were isolated by our lab and maintained in DMEM-high glucose media supplemented with 10% FBS, 1.8 g/L sodium bicarbonate, and 1% penicillin/streptomycin. PDGFRα-amplified TS543 human neurosphere cultures were grown using NeuroCult Basal medium NS-A (StemCell Technologies, Vancouver, Canada) supplemented with EGF (20 ng/ml, StemCell Technologies, Vancouver, Canada), FGF (10 ng/ml StemCell Technologies, Vancouver, Canada), heparin (2 mg/ml, StemCell Technologies, Vancouver, Canada), 1X Anti-Anti (Gibco, Gaithersburg, MD), and Z-VAD-FMK (4 ul/ml of media; BD Biosciences, Franklin Lakes, NJ). All cell lines were cultered at 37°C in a humidified incubator with 5% CO2 and routinely checked for mycoplasma contamination.

**Generation of PDGFR-β-driven murine glioblastoma multiforme.** 4x104 DF-1 cells (ATCC) expressing the RCAS-PDGFR-β retroviral vector were introduced via intracranial injection into neonatal, Nestin-tv-a Ink4a-Arf-/- mice 3 days after birth, or 6-8 week-old adults ,as previously described (9). Mice were monitored for signs of tumor burden (head tilt, lethargy, and hydrocephalus). Tumor burden was confirmed by T2-weighted magnetic resonance imaging (4.7T 40-cm bore Avance USR, Bruker, Billerica, MA) prior to the initiation of studies. All studies were performed in accordance with protocols approved by the MSKCC Institutional Animal Care and Use Committee and conformed to the NIH guidelines for animal welfare.

**Administration of intravital staining agents and C’ dots.** Mice with confirmed tumors were administered intravenous (i.v.) injections via tail vein of a cocktail of 15 μM cRAD- or cRGD-C’ dots and 100 uCi of 124I-labeled particles in a total volume of 100 ul. C’ dots were labeled with 124I via the IODOGEN method as previously described (10). Three hours prior to determined sacrifice time, mice were *i.v.* injected with 5 mg of 70 kDa FITC-Dextran in 50 ul of sterile water; Hoechst dye (100 μl, 16.2 mM) was also administered 5 minutes prior to sacrifice. Mice were sacrificed via carbon dioxide asphyxiation, and whole brains were extracted. Samples were frozen in Tissue-Tek O.C.T compound (Sakura Finetek, Torrance, CA) for future sectioning.

**Digital autoradiography of tissue sections.** Confirmed brain tumor tissue sections were exposed to a phosphor-imaging plate (Fujifilm BAS-MS2325, Fuji Photo Film, Japan) at -20°C. Following exposure, the phosphor-imaging plate was read at a resolution of 25 μm using a Typhoon 7000 IP plate reader (GE Life Sciences, Pittsburgh, PA) to acquire an image. Images were saved as both .tiff and .gel files for future analysis. Tumor-to-background ratios were calculated using ImageJ software (Ver. 2.0-rc-43/1.51h). Tumor areas were registered as ROIs according to the adjacent H&E. Normal areas of the brain were selected to match the overall area of the tumor ROI, and pixel intensity values were calculated. Average pixel intensity values for tumor ROIs were plotted using Prism 7 software (GraphPad, La Jolla, CA).

**89Zr-oxalate production**. 89Zr was produced at Memorial Sloan Kettering Cancer Center on a TR19/9 cyclotron (Ebco Industries Inc., Richmond, BC, Canda) *via* the 89Y(p,n)89Zr reaction and purified to yield 89Zr with a specific activity of 5.28-13.43 mCi/μg (470-1195 Ci/mmol) of zirconium(11). Activity measurements were performed using a CRC-15R Dose Calibrator (Capintec, Florham Park, NJ). For the quantification of activities, experimental samples were counted on an Automatic Wizard2 γ-Counter (PerkinElmer, Waltham, MA). A purity of greater than 95% was confirmed using radio-TLC for all of the 89Zr-DFO-cRGD-PEG-C’ dots.

**Synthesis of 89Zr-DFO-cRGDY-C’ dots.** Previously reported procedures (12) were used to synthesize 89Zr-DFO-cRGDY-PEG12-PEG6-Cy5-C’ dots (or simply 89Zr-cRGD-C’ dots). Amine-functionalized NH2-cRGD-C’ dots were first synthesized using a slightly modified water-based synthetic approach (3,12,13).Then, NH2-cRGD-C’ dots were reacted with DFO-NCS (molar ratio 1:20) for 2 hours at 22 °C, pH 8-9, under stirring at 640 rpm to form DFO-cRGD-C’ dots (# of DFO per particle was about 4). To label the DFO-cRGD-C’ dots with 89Zr, 0.75 nmol of DFO-cRGD-C’ dots were mixed with 1 mCi of 89Zr-oxalate in HEPES buffer (pH 8) at 37 ºC for 60 min (final labeling pH was kept at 7-7.5). An EDTA challenge process was introduced to remove any non-specifically bound 89Zr by shaking the mixture at 37 ºC for additional 60 min before the PD-10 purification. The final radiochemical purity (>99.9%) could be measured by using ITLC.

**Materials for the synthesis of (Maleimido-MAA-(dPEG2)3-F-R-MEDAC-Dasatinib)-Maleimido-cR(G/A)D-C’dots.** Reagents and solvents were purchased and used without further purification. Dichloromethane (DCM), anhydrous dimethylformamide (DMF), trifluoroacetic acid (TFA), and hexafluoroisopropanol (HFIP) were obtained from Acros; diisopropylethylamine (DIEA) and dimethyl-amino-pyridine (DMAP) from Sigma Aldrich; *N*-(*tert*-butoxycarbonyl)-*N'*-methylethylenediamine from Chem-Impex; dasatinib from Astatech; chlorotrityl resin, Fmoc-Phe, Fmoc-Arg(Pbf), *S*-acetylmercaptoacetic acid pentafluorophenyl ester (SAMA-OPfp) from Novabiochem, and Fmoc-dPEG2 from Quanta BioDesign. LCMS analysis was conducted on either an Agilent 1200/1260 Series LC system coupled to either an Agilent 6340 Ion Trap or Agilent 6550 QToF mass spectrometer (Hunter Mass Spectrometry). LC analysis was conducted using standard water/acetonitrile with 0.1% formic acid buffers, with an Agilent Zorbax SB-C8 column. Purification was conducted on an Agilent 1260 series preparative system with a Waters XBridge C18 column (Hunter Mass Spectrometry).

**Western blot analysis of RCAS/*tv-a* and human glioma cells**. Western blots were performed on DXFM and TS543 tumorsphere cell lysates for evaluation of *in vitro* target inhibition. DXFM and TS543 cells were starved in stem cell medium without growth factors for 18 hours before treatment. DXFM cells were then treated with either vehicle control, free dasatinib, or cRGD-Das-NDC for 48 hours followed by PDGF-BB (10 ng/ml) for 20 minutes. TS543 cells were treated with free dasatinib or cRGD-Das-NDC for 4 hours and subsequently stimulated with PDGF-BB (20 ng/ml) for 10 minutes. The targets p-AKT (Tyr 527; 1:1000, #4060S, Cell Signaling, Danvers, MA), AKT (1:2000, #4691S, Cell Signaling, Danvers, MA), p-S6RP (Ser235; 1:1000 #2211S, Cell Signaling, Danvers, MA), S6RP (1:2000, #2217S, Cell Signaling, Danvers, MA), p-PDGFRα (Tyr720; 1:500, sc-12910-R, Santa Cruz, Dallas, TX), PDGFRα (1:1000, sc-338, Santa Cruz, Dallas, TX), p-Src (Tyr416; 1:1000, #2101S, Cell Signaling, Danvers, MA), Src (1, 1000, #2108S, Cell Signaling, Danvers, MA), p-PRAS40 (Thr246; 1:1000, #2997S, Cell Signaling, Danvers, MA ), α-tubulin (1:5000, #2125S, Cell Signaling, Danvers, MA), and β-actin (1: 5000, sc-47778, Santa Cruz, Dallas, TX) were evaluated using standard Western blot techniques.

**Statistical Analysis.** All graphs were generated using GraphPad Prism 7 (GraphPad Software, San Diego, CA). Additionally, all data was analysed using GraphPad Prism 7 software. The presented statistics are results of unpaired Student’s t tests comparing no less than three replicates per group (**P* < .05; ***P* < .01; ****P* < .001).

**Supplemental Table, Scheme, and Figures**

**Supplemental Table 1. Summarized data of brain tumor-targeting nanoparticle platforms in models of murine GBM.** Special focus was placed on quantitation of intratumoral nanoparticle distribution, hydrodynamic particle size, base material, time of evaluation, method of detection, multimodality capabilities, and means of quantification. **acRGD-C’ dot:** cRGDY-PEG12_PEG6-Cy5-C’ dots conjugated with a cleavable dasatinib drug linker. **bPTX/PLGA-PEG, PTX/PLGA:** poly(lactide-coglycolic acid) nanoparticles with or without PEG coating encapsulating paclitaxel. **cDSPE-PEG2K-Cy5.5-Transferrin/Folate**: Transferrin or folate-conjugated DSPE-PEG2K liposomes labeled with Cy5.5 dye and packaged with JQ1 and/or temozolomide. **dPLGA:** poly(lactide-coglycolic acid) nanoparticles encapsulating Nile Red dye; Vd/Vi = volume of distribution/volume of infusion. **eAmphiphilic Polymer Nanoparticles:** Dodecylamine covalently linked to poly(methacrylic acid), polysorbate 80, and starch incorporating docetaxel and labeled with Nile Red, HiLyte Fluor 750, or Fluoreceinamine isomer I. **fAuNP-A&C-R:** aggregates of two nanoparticles (AuNP-AK-R; gold nanoparticle functionalized with AK and R8-RGD, AuNP-CABT-R; gold nanoparticle adapted with 2-cyano-6-amino-benzothiazole and R8-RGD) formed in the presence of legumain with optional Cy5.5 label incorporation. **gAuNP:** glutathione-coated gold nanoparticles. **hcRGDyK-SERRS:** cRGDyK-conjugated gold ‘surface-enhanced resonance Raman spectroscopy’ particles. **iIR780-liposome, IR780-micelle:** IR780 dye incorporated DSPC, cholesterol, DPSE-PEG2000 (54.8:40:5) phospholipid nanoparticles. **jQD-PEG-P:** CISe/ZnS quantum dots coated with PEG and functionalized with CGKRK targeting peptide. **kNPCP-BG-CTX:** iron oxide core nanoparticles (NP) coated with chitosan-PEG (CP) and adapted with O6-benzylguanine (BG) and chlorotoxin (CTX). **lPLGA-PEG-ITEM4:** ITEM4 conjugated PLGA-PEG particles labeled with rhodamine or indocyanine green. **mCRT-PEG-PLGA-PTX:** CRTIGPSVC (CRT) peptide modified poly(ethylene glycol), (PEG)-poly(D,L-lactic-*co*-glycolic acid) nanoparticles loaded with paclitaxel and labeled with DiR. **n1@PNPs-Gint4.T:** PLGA-block-PEG nanoparticles incorporating dactolisib and functionalized with the PDGFRβ targeting Gint4.T aptamer, particles labeled with BODIPY505-515. **oLf-PEG-PLGA-PTX:** Lactoferrin functionalized pegylated PLGA nanoparticles incorporating paclitaxel, particles labeled with coumarin-6 or DiR. *****All platforms utilized optical imaging as the modality for visualization unless otherwise noted.

**Supplementary Scheme 1. Generation of PDGF-driven RCAS glioma model followed by treatment with C’ dots and intravital stains. a**)PDGF-driven RCAS producing DF-1 cells are injected intracranially in newborn mice 24-48 hours after birth. **b**) Following confirmation of brain tumors on MRI, performed 3-4 weeks following injection, mice are i.v.-injected via tail vein (t.v.) with either integrin targeting cRGD-C’ dots or scrambled cRAD-C’ dots and sacrificed at 3 or 96 hours. 70kDa FITC-labeled Dextran was used as a surrogate marker to map blood brain barrier breakdown and was concurrently administered via t.v. in the 3-hour paradigm followed by the nuclear stain Hoechst administered within 10 minutes of sacrifice. In the 96-hour paradigm, C’ dots were administered and animals sacrificed 96 hours post-treatment, with FITC-Dextran administered via t.v. 3 hours prior to sacrifice and Hoechst within 10 minutes of sacrifice. As such, this paradigm prescribes a distinct method of concurrent intravital staining for visualization of three independent fluorescent signals with unique properties of temporal and spatial distribution and diffusion relative to the blood brain barrier. The 70kDa size of FITC-Dextran was utilized as it roughly approximates the size of the C’ dot in order to evaluate the effect of size alone on distribution and retention.

**Supplemental Figure 1. Ligand density-dependent binding and internalization of cRGD-C’ dots in RCAS/tv-a derived glioma** **cells. a**) Flow cytometry-based cell binding study demonstrating a ligand-density dependent increase in cRGD-C’ dot cell binding. Modest increases in cRAD-C’ dot binding was observed at high ligand densities. Plot displays median fluorescence intensity values for all tested groups (Student’s T-test, *** p = 0.0001, **** p < 0.0001). **b**) Temperature dependent uptake of cRGD-C’ dots with varying ligand densities (n=6-18). Cells were exposed to cRGD-C’ dot particles for 4 hours at 4, 25, and 37°C and analyzed via flow cytometry. Results are plotted as median fluorescence intensities (Student’s T-test, **** p < 0.0001). **c**) High-resolution confocal microscopy of cRGD-C’ dot uptake in glioma cells outlined with DiO (green) and counterstained with DAPI (blue) for nuclear localization (scale bars = 5 μm). **d**) Confocal microscopy images of untreated glioma cells showing lack of C’ dot signal (red) within the cell, demonstrated by DiO (green) membrane labeling and DAPI (blue) nuclear stain (scale bare = 5 μm).

**Supplemental Figure 2. Distribution profiles of cRAD and cRGD functionalized C’ dots at 3-hour time points. a, b**) Whole brain frozen section imaging of RCAS/*t-va* brain tumor bearing mice treated with intravital co-injections of either cRGD-C’ dot (**a**, red) or cRAD-C’ dot (**b**, red) with 70 kDa FITC-Dextran (green). Hoechst (blue) was administered 5 minutes prior to sacrifice. H&E staining of adjacent tissue sections are also displayed. **c**) High magnification imaging of RCAS/*t-va* tumor at 3 hours post-injection. Imaging suggests intracellular localization of cRGD-C’ dots (red) given its co-localization with the endolysosomal marker FITC-Dextran (green), and close proximity to cell nuclei (Hoechst, blue). Images were captured at 60X magnification. **Panels 1** and **2** demonstrates triple fluorescent images depicting nuclei (blue) FITC-Dextran (green) and cRGD-C’ dots (red). **Panel 3** exhibits high resolution imaging showing strong cRGD-C’ dot signal (red) in close proximity to nuclei (blue). **Panel 4** highlights the distribution of 70 kDa FITC-Dextran (green) in relation to cellular nuclei (blue). **Panels 5** and **6** display single channel images of 70 kDa FITC-Dextran and cRGD-C’ dot (Cy5), respectively.

**Supplementary Figure 3. Synthesis of (Maleimido-MAA-(dPEG2)3-F-R-MEDAC-Dasatinib)-Maleimido-cR(G/A)D-PEG-C’dots**

Compound **3**. Dasatinib was reacted with *bis*-4-nitrophenyl carbonate (1.5 eq.) in anhydrous dimethylformamide (DMF) with diisopropylethylamine (DIEA) (2 eq.) and dimethyl-amino-pyridine (DMAP) (0.1 eq.) for 16 hrs forming **3**. The solvent was removed *in vacuo*, and the resulting oil was washed with ether and used without further purification. MS (*m/z*) for C29H29ClN8O6S: [M+H]+ *calc.* 653.2, *obs.* 653.5.

Compound **4**. Compound **3** was reacted with *N*-(*tert*-butoxycarbonyl)-*N'*-methylethylenediamine (2 eq.) in dimethylformamide (DMF) with diisopropylethylamine (DIEA) (3 eq.) resulting in **4**. The solvent was removed *in vacuo*, and the resulting oil was washed with ether and used without further purification. HRMS (*m/z*) for C31H42ClN9O5S: [M+H]+ *calc.* 688.2791, *obs.* 688.2796.

Compound **5**. Compound **4** was deprotected with TFA:water (90:10) for 15 min providing the methylethylenediamine carbonyl dasatinib (MEDAC-dasatinib) product. The solvent was removed *in vacuo*, and the resulting oil was washed with ether and used without further purification. HRMS (*m/z*) for C26H34ClN9O3S: [M+H]+ *calc.* 588.2267, *obs.* 588.2264.

Compound **6**. Compound **6** was prepared using standard solid-phase peptide synthesis (SPPS) procedures. Fmoc-Arg(Pbf)-OH (1.5 eq) was loaded onto chlorotrityl resin (1.1 mmol/g) in DCM and DIEA (3 eq) for 1 hr, followed by washes with DMF (3x). Fmoc was deprotected with 20% piperidine in DMF for 10 min, followed by DMF washes (3x). Fmoc-Phe-OH (3 eq) was coupled using HATU (3 eq) and DIEA (5 eq) in DMF for 1 hr, followed by DMF washes (3x). Fmoc was deprotected with 20% piperidine in DMF for 10 min, followed by DMF washes (3x). Fmoc-dPEG2-OH (2 eq) was coupled using HATU (2eq) and DIEA (5 eq) in DMF for 1 hr, followed by DMF washes (3 eq). Fmoc was deprotected with 20% piperidine in DMF for 10 min, followed by DMF washes (3x). Fmoc-dPEG2-OH coupling and Fmoc deprotection was repeated two more times. The peptide-resin was then reacted with di-*tert*-butyl-carbonate (5 eq) with DIEA (10 eq) in DMF for 1 hr, followed by washes was DCM (5x). The peptide was cleaved from resin using 30% HFIP in DCM for 1 hr. The solvent was removed *in vacuo*, and the resulting oil was purified by C18 reversed phase chromatography, resulting in the desired product **6**. HRMS (*m/z*) for C54H86N8O17S: [M+H]+ *calc.* 1151.5904, *obs.* 1151.5913.

Compound **7**. Compound **5** (1.2 eq) and **6** (1 eq) were coupled using HATU (1.1 eq) and DIEA (3 eq) in DMF for 30 min. The solvent was removed *in vacuo*, and the resulting oil was purified by flash chromatography. MS (*m/z*) for C80H118ClN17O19S2: [M+H]+ *calc.* 1720.8, obs. 1720.9.

Compound **8**. Compound **7** was deprotected with TFA:water (90:10) for 1 hr. The solvent was removed *in vacuo*, and the resulting oil was washed with ether and used without further purification. MS (*m/z*) for C62H94ClN17O14S: [M+H]+ *calc.* 1367.7, obs. 1367.9.

Compound **9**. Compound **8** (1 eq) was treated with *S*-acetylmercaptoacetic acid pentafluorophenyl ester (SAMA-OPfp) (1.5 eq) in DMF with DIEA (3 eq) for 30 min. The solvent was removed *in vacuo*, and the resulting oil was purified by C18 reversed phase chromatography. HRMS (*m/z*) for C66H98ClN17O16S2: [M+H]+ *calc.* 1484.6580, *obs.* 1484.6579.

Compound **10**. Prior to use **9** was deprotected with 100 mM NaOH for 10 min, then neutralized with 100 mM HCl providing the mercaptoacetamido-(dPEG2)3-F-R-MEDAC-dasatinib product – which was used without further purification. HRMS (*m/z*) for C64H96ClN17O15S2: [M+H]+ *calc.* 1442.6475, *obs.* 1442.6482.

Compound **1**. Compound **10** was reacted with nanoparticles containing maleimide groups (maleimido-PEG-C’dots) to obtain **1**, (MAA-(dPEG2)3-F-R-MEDAC-dasatinib)-maleimido-cRGD-PEG-C’dots. The NDC (**1**) was purified using a Biogel P10 column and drug per particle levels were assessed by HPLC.

Compound **2**. Compound **9** was reacted with nanoparticles containing maleimide groups (maleimido-PEG-C’dots) to obtain **2**, (MAA-(dPEG2)3-F-R-MEDAC-dasatinib)-maleimido-cRGD-PEG-C’dots. The NDC (**2**) was purified using a Biogel P10 column and drug per particle levels were assessed by HPLC.

**Supplemental Figure 4. Mechanism of dasatinib release and *in vitro* inhibition of PDGFR signaling. a**) Schematic of dasatinib-NDC demonstrating the proposed mechanism of native drug release. **a1**) Diagram of complete dasatinib-NDC construct highlighting the site of proteolytic cleavage. **a2**) Initial, fast, proteolytic cleavage of dasatinib-NDC results in the release of MEDAC-dasatinib precursor construct. **a3**) Released MEDAC-dasatinib product then undergoes a slow, intramolecular cyclization. **a4**) As a result of the intramolecular cyclization, both free native dasatinib drug and a methyl-urea byproduct are released. **b**) Western blot evaluation of cRGD-Das-NDC induced inhibition of the PDGFR signaling pathway. DXFM glioma cells were treated with either free dasatinib or cRGD-Das-NDC over a range of concentrations (0-10 uM) for 48 hours. Cells were stimulated with PDGF-BB (40 ng/ml) for 20 minutes prior to collection. The active downstream effectors of PDGFR, p-AKT and p-S6RP, were evaluated for inhibition of phosphorylation via Western blot. **c**) Additional Western blot of cRGD-Das-NDC treated DXFM cells evaluating the expression levels of p-Src and p-PRAS40. **d**) Human TS543 neurosphere cells were treated with increasing concentrations of either dasatinib (10 nM–10 uM) or cRGD-Das-NDCs (100 nM-10 uM) after which the phosphorylation levels of PDGFRα were evaluated via Western blot. cRGD-Das-NDCs exhibited similar efficacy in the inhibition of evaluated markers when compared to free dasatinib across all tested concentrations and models.

**Supplemental Figure 5. cRGD-Das-NDC inhibition of S6RP phosphorylation in mGBM. a**) Demonstration of p-S6RP IHC staining in two additional untreated control tumor bearing mice. Images show whole brain H&E staining confirming tumor presence in brain (left column), high magnification H&E image of tumor ROI (middle column), and high magnification mGBM tissue specimens harvested 24 hours post-injection. Confirmation of tumor was demonstrated by whole brain section H&E (left column). High magnification images of H&E (middle column) and p-S6RP (right column) staining in ROIs of brain tumors.

**Supplemental Figure 6. Distribution and uptake of 124I radiolabeled cRGD-C’ dots in patient with metastatic breast cancer in a concurrent active clinical trial.** A patient with known breast cancer and right occipital metastasis was given intravenous administration of 124I radiolabeled cRGD-C’ dots at a tracer dose (<30 nmoles). Patient subsequently underwent PET imaging 4 hours post-administration (**a**,**b**) with surgical resection 24 hours following treatment. Tumor tissue taken from the patient during surgery was analyzed using H&E staining (**c**,**d**), autoradiography (**e**,**f**), and fluorescence microscopy (**g**,**h**). This cystic tumor demonstrated avid uptake in the nodular and enhancing regions of the tumor on PET imaging with corresponding autoradiography signal (**e**,**f**) overlapping with Cy5 fluorescence (**g**,**h**), demonstrating evidence of particle uptake into the tumor and retention 24 hours post-administration. Notably, there is uptake in the leptomeninges on PET imaging (**a**,**b**), which is consistent with known particle distributions at this time point.

**Supplemental Video 1. 0.5 and 24 hr Maximum Intensity Projection (MIP) Videos of 89Zr-cRGD-C’ dots in a Brain Tumor Bearing Mouse.** Video representation of the mouse featured in **Figure 5a**. **a**) Early, 0.5 hr, MIP video of a brain tumor mouse injected with 89Zr-cRGD-C’ dots. PET imaging shows diffuse whole-body distribution with high activity present in the bladder. Low levels of uptake are observed in the brain. **b**) 24-hour MIP video of the same mouse showing increased accumulation at the tumor site (~7%1D/g) within the brain, as well as elevated levels of activity present in the bladder.

**Supplemental References**

1. Herz E, Ow H, Bonner D, Burns A, Wiesner U. Dye structure–optical property correlations in near-infrared fluorescent core-shell silica nanoparticles. Journal of Materials Chemistry **2009**;19(35):6341-7 doi 10.1039/B902286D.

2. Herz E, Burns A, Bonner D, Wiesner U. Large stokes-shift fluorescent silica nanoparticles with enhanced emission over free dye for single excitation multiplexing. Macromolecular rapid communications **2009**;30(22):1907-10 doi 10.1002/marc.200900389.

3. Ma K, Mendoza C, Hanson M, Werner-Zwanziger U, Zwanziger J, Wiesner U. Control of Ultrasmall Sub-10 nm Ligand-Functionalized Fluorescent Core–Shell Silica Nanoparticle Growth in Water. Chemistry of Materials **2015**;27(11):4119-33 doi 10.1021/acs.chemmater.5b01222.

4. Ma K, Zhang D, Cong Y, Wiesner U. Elucidating the Mechanism of Silica Nanoparticle PEGylation Processes Using Fluorescence Correlation Spectroscopies. Chemistry of Materials **2016**;28(5):1537-45 doi 10.1021/acs.chemmater.6b00030.

5. Ma K, Wiesner U. Modular and Orthogonal Post-PEGylation Surface Modifications by Insertion Enabling Penta-Functional Ultrasmall Organic-Silica Hybrid Nanoparticles. Chemistry of Materials **2017**;29(16):6840-55 doi 10.1021/acs.chemmater.7b02009.

6. Larson DR, Ow H, Vishwasrao HD, Heikal AA, Wiesner U, Webb WW. Silica Nanoparticle Architecture Determines Radiative Properties of Encapsulated Fluorophores. Chemistry of Materials **2008**;20(8):2677-84 doi 10.1021/cm7026866.

7. Kohle FFE, Hinckley JA, Wiesner UB. Dye Encapsulation in Fluorescent Core–Shell Silica Nanoparticles as Probed by Fluorescence Correlation Spectroscopy. The Journal of Physical Chemistry C **2019**;123(15):9813-23 doi 10.1021/acs.jpcc.9b00297.

8. Barteau KP, Ma K, Kohle FFE, Gardinier TC, Beaucage PA, Gillilan RE*, et al.* Quantitative Measure of the Size Dispersity in Ultrasmall Fluorescent Organic–Inorganic Hybrid Core–Shell Silica Nanoparticles by Small-Angle X-ray Scattering. Chemistry of Materials **2019**;31(3):643-57 doi 10.1021/acs.chemmater.8b04369.

9. Hambardzumyan D, Amankulor NM, Helmy KY, Becher OJ, Holland EC. Modeling Adult Gliomas Using RCAS/t-va Technology. Translational oncology **2009**;2(2):89-95.

10. Burns AA, Vider J, Ow H, Herz E, Penate-Medina O, Baumgart M*, et al.* Fluorescent silica nanoparticles with efficient urinary excretion for nanomedicine. Nano letters **2009**;9(1):442-8 doi 10.1021/nl803405h.

11. Holland JP, Sheh Y, Lewis JS. Standardized methods for the production of high specific-activity zirconium-89. Nuclear medicine and biology **2009**;36(7):729-39 doi 10.1016/j.nucmedbio.2009.05.007.

12. Chen F, Ma K, Zhang L, Madajewski B, Zanzonico P, Sequeira S*, et al.* Target-or-Clear Zirconium-89 Labeled Silica Nanoparticles for Enhanced Cancer-Directed Uptake in Melanoma: A Comparison of Radiolabeling Strategies. Chemistry of materials : a publication of the American Chemical Society **2017**;29(19):8269-81 doi 10.1021/acs.chemmater.7b02567.

13. Iler RK. The Chemistry of Silica: Solubility, Polymerizaion, Colloid and Surface Properties, and Biochemistry. New York: Wiley; 1979.
